# Supplementary material for: Improvement of hydrogen storage property of three-component Mg(NH2)2–LiNH2–LiH composites by additives
Source: Royal Society of Chemistry journal article supplement (doi:10.1039/c6dt02845d), 2016-01-01
Supplement: c6dt02845d1.pdf [file c6dt02845d1.pdf]

## *Supplementary Information*

### **Improvement of hydrogen storage property of three-component Mg(NH<sub>2</sub>)<sub>2</sub>-LiNH<sub>2</sub>-LiH composites by additives**

Huai-Jun Lin<sup>a, \*</sup>, Hai-Wen Li<sup>a, c</sup>, Biswajit Paik<sup>a</sup>, Jianhui Wang<sup>a, d</sup> and Etsuo Akiba<sup>a, b, c</sup>

<sup>a</sup> International Research Center for Hydrogen Energy, Kyushu University, Fukuoka, Japan

<sup>b</sup> Department of Engineering, Kyushu University, Fukuoka, Japan

<sup>c</sup> International Institute of Carbon-Neutral Energy Research (WPI-I<sup>2</sup>CNER), Kyushu University,  
Fukuoka, Japan

<sup>d</sup> Department of Chemical System Engineering, The University of Tokyo, Tokyo, Japan

\* Corresponding author: [lin.huaijun.916@m.kyushu-u.ac.jp](mailto:lin.huaijun.916@m.kyushu-u.ac.jp)

Table S1 Values of various functions of  $\alpha$  in some commonly used reaction equations together with those extracted from  $\text{Mg}(\text{NH}_2)_2\text{-LiNH}_2\text{-4LiH}$  and the  $\text{Mg}(\text{NH}_2)_2\text{-LiNH}_2\text{-3.9LiH-0.1KH}$  samples.

| $\alpha$ | Value for $t/t_{0.5}$       |                             |                             |                             |                             |                             |                             |                             |                             | Mg(NH <sub>2</sub> ) <sub>2</sub> -LiNH <sub>2</sub> -4LiH |       | Mg(NH <sub>2</sub> ) <sub>2</sub> -LiNH <sub>2</sub> -3.9LiH-0.1KH |       |
|----------|-----------------------------|-----------------------------|-----------------------------|-----------------------------|-----------------------------|-----------------------------|-----------------------------|-----------------------------|-----------------------------|------------------------------------------------------------|-------|--------------------------------------------------------------------|-------|
|          | D <sub>1</sub> ( $\alpha$ ) | D <sub>2</sub> ( $\alpha$ ) | D <sub>3</sub> ( $\alpha$ ) | D <sub>4</sub> ( $\alpha$ ) | F <sub>1</sub> ( $\alpha$ ) | R <sub>2</sub> ( $\alpha$ ) | R <sub>3</sub> ( $\alpha$ ) | A <sub>2</sub> ( $\alpha$ ) | A <sub>3</sub> ( $\alpha$ ) | 140°C                                                      | 180°C | 140°C                                                              | 180°C |
| 0.1      | 0.040                       | 0.033                       | 0.028                       | 0.032                       | 0.152                       | 0.174                       | 0.165                       | 0.390                       | 0.533                       | 0.20                                                       | 0.24  | 0.66                                                               | 0.63  |
| 0.2      | 0.160                       | 0.140                       | 0.121                       | 0.135                       | 0.322                       | 0.362                       | 0.349                       | 0.567                       | 0.685                       | 0.38                                                       | 0.44  | 0.76                                                               | 0.75  |
| 0.3      | 0.360                       | 0.328                       | 0.295                       | 0.324                       | 0.515                       | 0.556                       | 0.544                       | 0.717                       | 0.801                       | 0.58                                                       | 0.59  | 0.83                                                               | 0.84  |
| 0.4      | 0.640                       | 0.609                       | 0.576                       | 0.595                       | 0.737                       | 0.768                       | 0.762                       | 0.858                       | 0.903                       | 0.78                                                       | 0.79  | 0.90                                                               | 0.92  |
| 0.5      | 1.000                       | 1.000                       | 1.000                       | 1.000                       | 1.000                       | 1.000                       | 1.000                       | 1.000                       | 1.000                       | 1.00                                                       | 1.00  | 1.00                                                               | 1.00  |
| 0.6      | 1.440                       | 1.521                       | 1.628                       | 1.541                       | 1.322                       | 1.253                       | 1.277                       | 1.150                       | 1.097                       | 1.22                                                       | 1.45  | 1.04                                                               | 1.07  |
| 0.7      | 1.960                       | 2.207                       | 2.568                       | 2.297                       | 1.737                       | 1.543                       | 1.607                       | 1.318                       | 1.198                       | 1.51                                                       | 2.31  | 1.12                                                               | 1.14  |
| 0.8      | 2.560                       | 3.115                       | 4.051                       | 3.378                       | 2.322                       | 1.887                       | 2.014                       | 1.524                       | 1.322                       | 1.96                                                       | 4.00  | 1.35                                                               | 1.24  |
| 0.9      | 3.240                       | 4.363                       | 6.747                       | 5.028                       | 3.322                       | 2.334                       | 2.602                       | 1.822                       | 1.492                       | 3.28                                                       | 8.65  | 1.95                                                               | 1.49  |

Table S2 selected compositions of the  $\text{Mg}(\text{NH}_2)_2\text{-LiNH}_2\text{-LiH}$  system in this study.

| $\text{Mg}(\text{NH}_2)_2$ | $\text{LiNH}_2$ | $\text{LiH}$ | $\text{KH}$ |
|----------------------------|-----------------|--------------|-------------|
| 1                          | 1               | 4            | —           |
| 1                          | 1               | 3.9          | 0.1         |
| 2                          | 1               | 4            | —           |
| 2                          | 1               | 3.9          | 0.1         |
| 1                          | 2               | 4            | —           |
| 1                          | 2               | 3.9          | 0.1         |
| 1                          | 1               | 5            | —           |
| 1                          | 1               | 4.9          | 0.1         |
| 2                          | 1               | 5            | —           |
| 2                          | 1               | 4.9          | 0.1         |
| 1                          | 2               | 5            | —           |
| 1                          | 2               | 4.9          | 0.1         |
| 1                          | 1               | 6            | —           |
| 1                          | 1               | 5.9          | 0.1         |
| 2                          | 1               | 6            | —           |
| 2                          | 1               | 5.9          | 0.1         |
| 1                          | 2               | 6            | —           |
| 1                          | 2               | 5.9          | 0.1         |

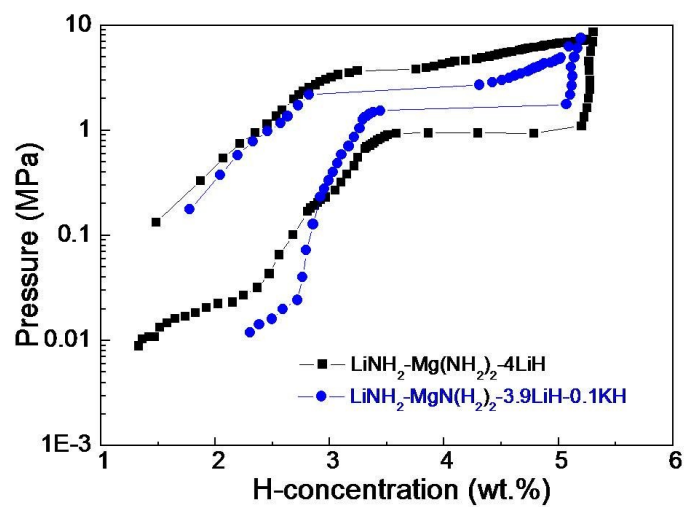

Fig. S1 experimental PCIs of the  $\text{Mg(NH}_2\text{)}_2\text{-LiNH}_2\text{-4LiH}$  and  $\text{Mg(NH}_2\text{)}_2\text{-LiNH}_2\text{-3.9LiH-0.1KH}$  samples at  $180^\circ\text{C}$ . The hysteresis of the PCIs is significantly reduced to 0.82MPa for the  $\text{Mg(NH}_2\text{)}_2\text{-LiNH}_2\text{-3.9LiH-0.1KH}$  sample compared with 2.78MPa for the  $\text{Mg(NH}_2\text{)}_2\text{-LiNH}_2\text{-4LiH}$  sample.

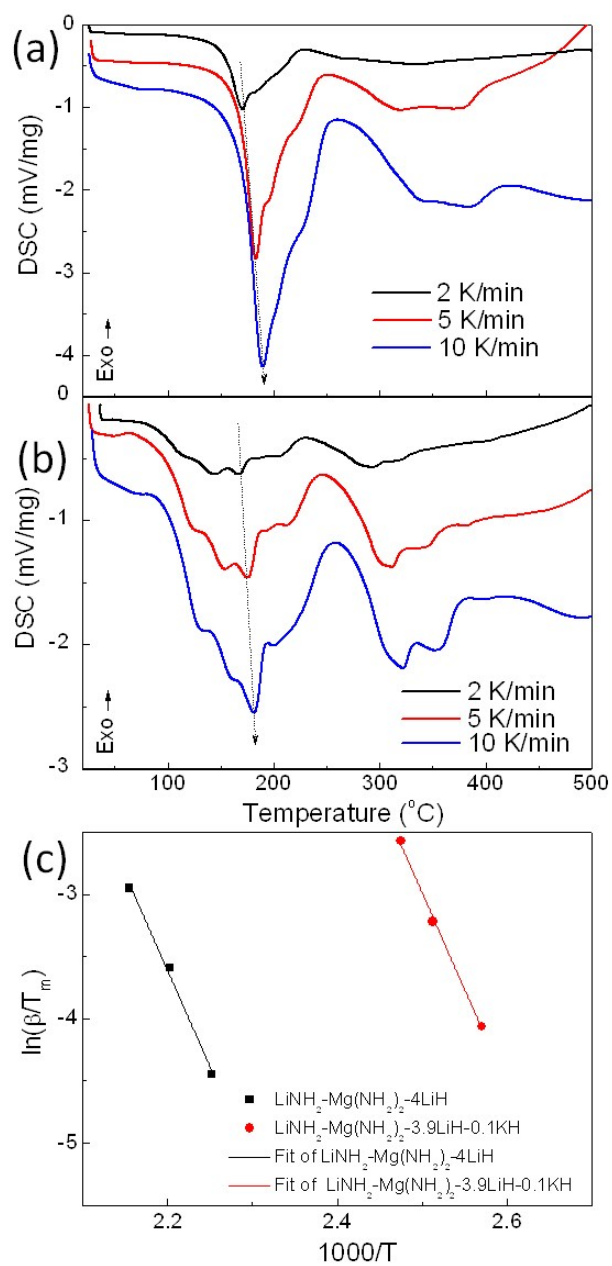

Fig. S2 DSC traces of (a) Mg(NH<sub>2</sub>)<sub>2</sub>-LiNH<sub>2</sub>-4LiH and (b) Mg(NH<sub>2</sub>)<sub>2</sub>-LiNH<sub>2</sub>-3.9LiH-0.1KH samples at different heating rates. (c) Kissinger's plots for the above two samples.

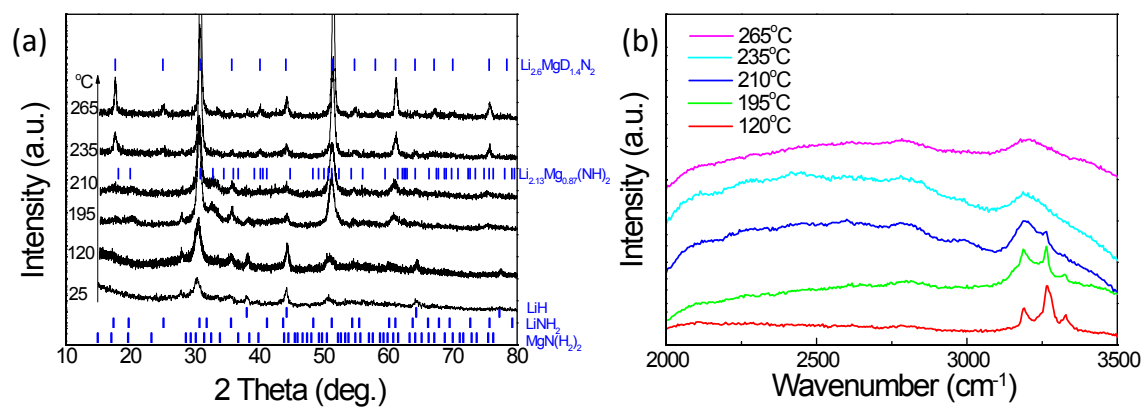

Fig. S3 Evolution of (a) XRD patterns and (b) Raman spectra of the Mg(NH<sub>2</sub>)<sub>2</sub>-LiNH<sub>2</sub>-4LiH composite during dehydrogenation.

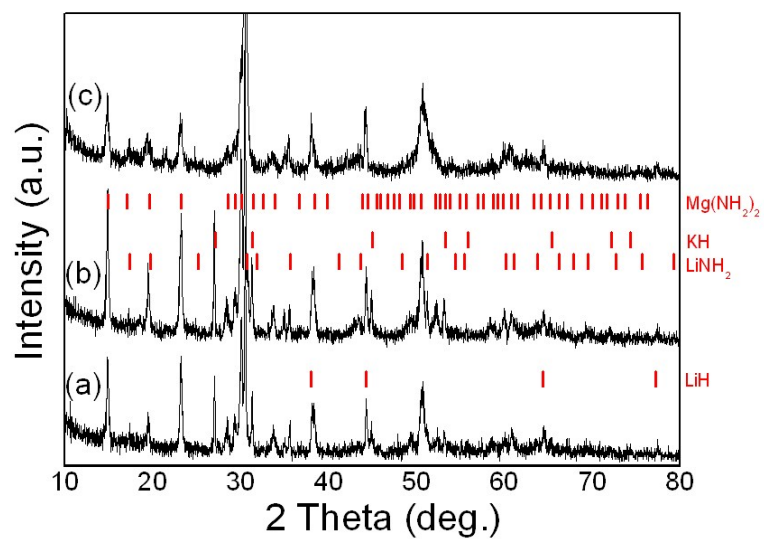

Fig. S4 XRD patterns of (a) 1st cycled and (b) 12th cycled Mg(NH<sub>2</sub>)<sub>2</sub>-LiNH<sub>2</sub>-3.9LiH-0.1KH, and (c) 12th cycled Mg(NH<sub>2</sub>)<sub>2</sub>-LiNH<sub>2</sub>-4LiH, all in hydrogenated state.
